# Supplementary material for: SUN anchors pollen WIP–WIT complexes at the vegetative nuclear envelope and is necessary for pollen tube targeting and fertility
Source: PubMed Central journal article supplement (PMC4765795; doi:10.1093/jxb/erv425), 2015-09-25
Supplement: supp_erv425_jexbot154997_file001.pdf [file supp_erv425_jexbot154997_file001.pdf]

# SUN anchors pollen WIP-WIT complexes at the vegetative nuclear envelope and is necessary for pollen tube targeting and fertility

Xiao Zhou, Norman Reid Groves, and Iris Meier

## Supplementary Data

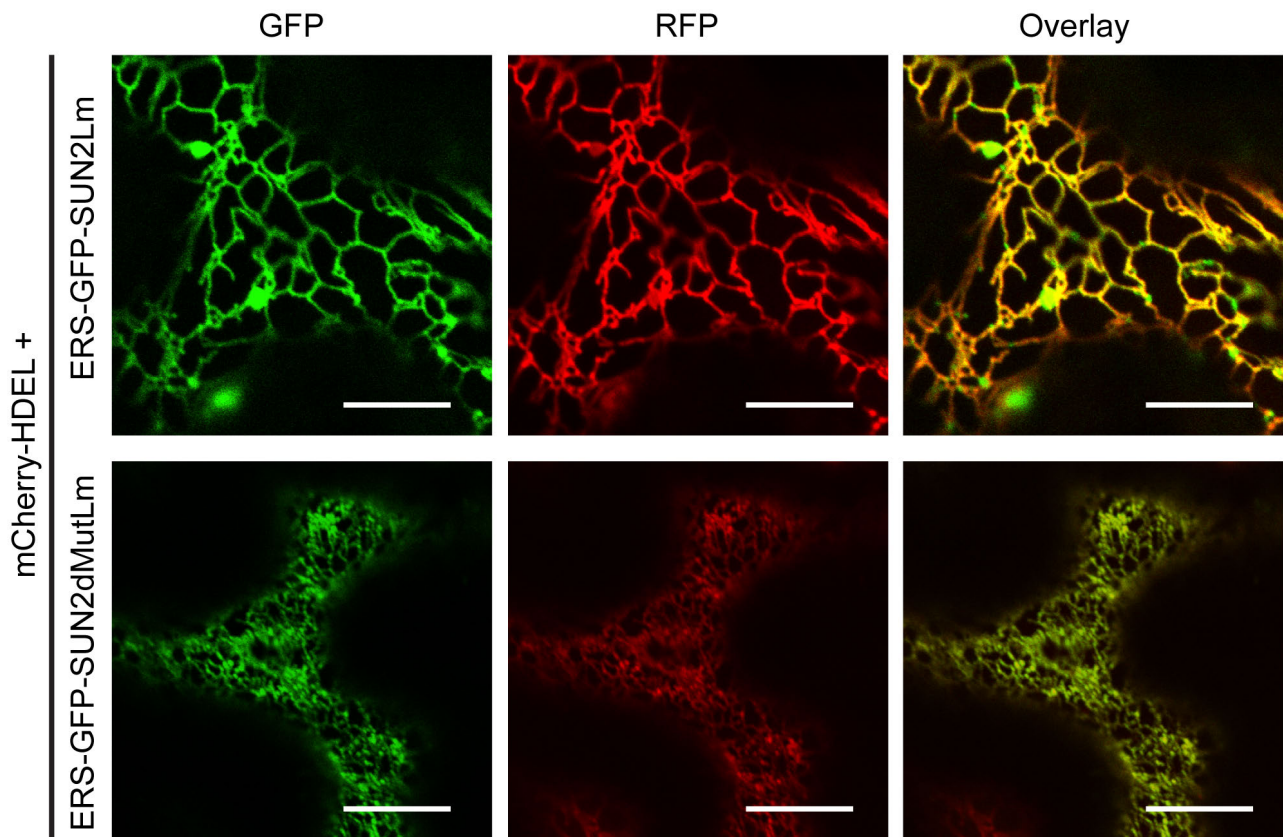

**Figure S1. ERS-GFP-SUN2Lm and ERS-GFP-SUN2dMutLm localize to the ER in *N. benthamiana*.**

An mCherry-ER marker was co-expressed with *35Spro::ERS-GFP-SUN2Lm* and *35Spro::ERS-GFP-SUN2dMutLm* in *N. benthamiana*, respectively. Both ERS-GFP-SUN2Lm and ERS-GFP-SUN2dMutLm were colocalized with mCherry-ER at the ER network. Scale bar equals 10μm.

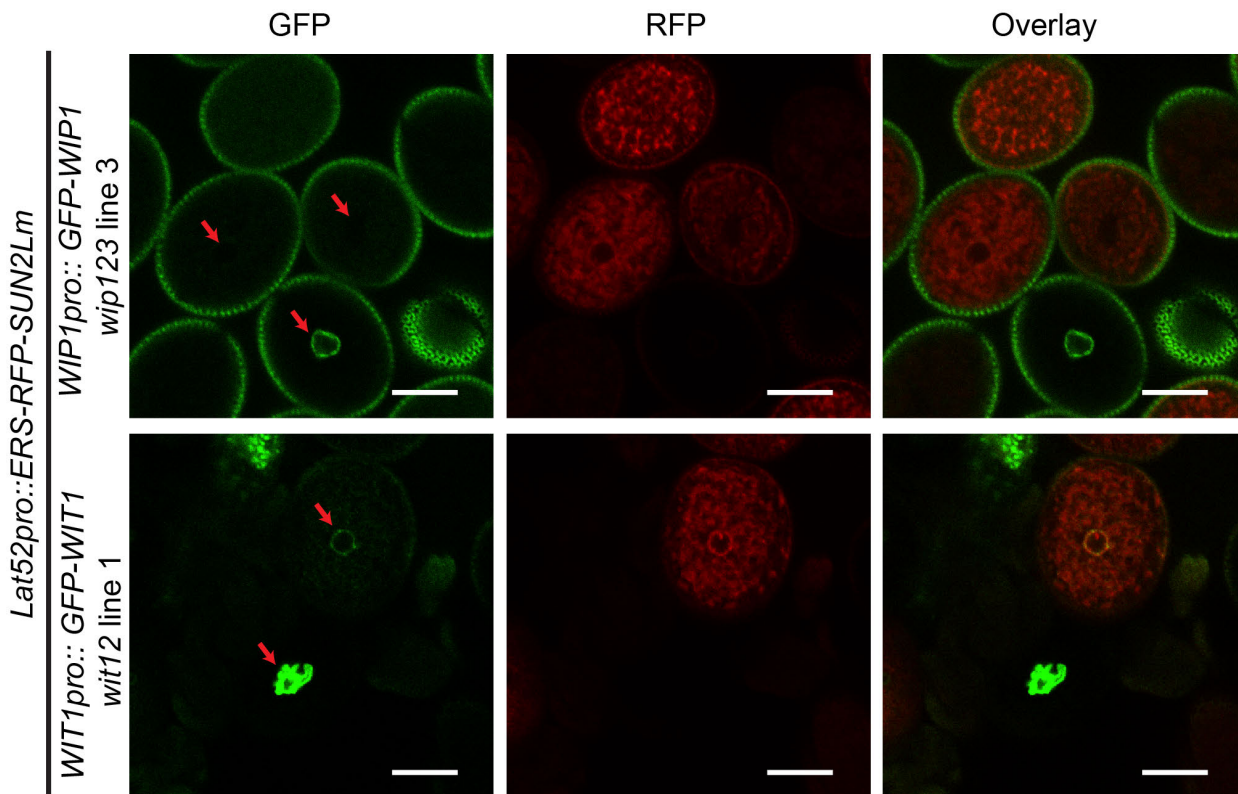

**Figure S2. ERS-RFP-SUN2Lm delocalizes WIP1 and WIT1 from the NE in pollen grains.**

*ERS-RFP-SUN2Lm* driven by *Lat52pro* was expressed in the pollen of *WIP1pro::GFP-WIP1 wip123* and *WIT1pro::GFP-WIT1 wit12*, respectively. The pollen grains of heterozygous plants were examined. The GFP channel was adjusted to resolve the VNE localization (red arrows in the GFP channel images) of GFP-WIP1 or GFP-WIT1. Some pollen grains are without visible VN because the VN were not in the confocal imaging plane. Scale bars =10 $\mu$ m.

**A** *SINE1**pro*::GFP-  
*SINE1* WT

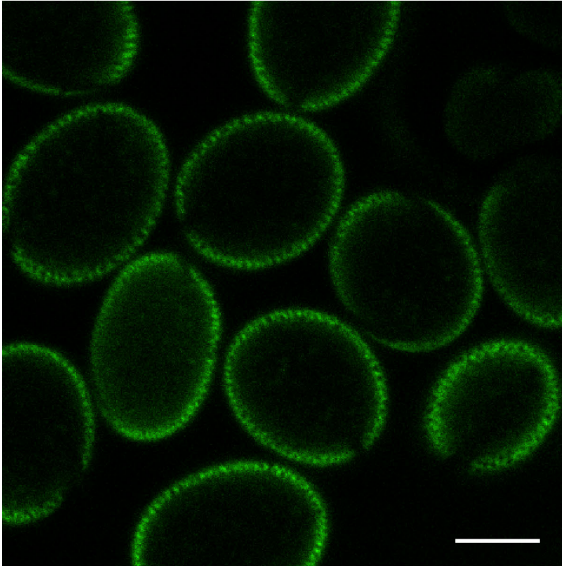

**B** *SINE2**pro*::GFP-  
*SINE2* WT

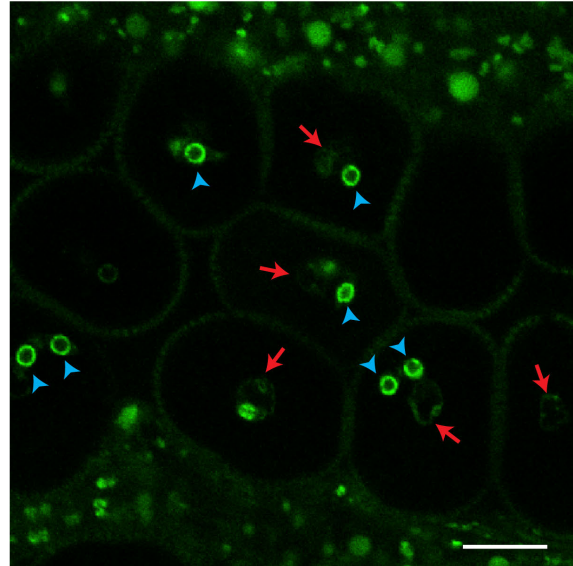

**Figure S3. Expression and localization pattern of SINE1 and SINE2 in WT pollen.**

(A) *GFP-SINE1* driven by *SINE1* promoter (*SINE1pro*::*GFP-SINE1*) shows no expression in pollen. (B) *GFP-SINE2* driven by *SINE2* promoter (*SINE2pro*::*GFP-SINE2*) is localized at the VNE (red arrows) and the SC NE (blue arrowheads). The *GFP-SINE1* image was obtained at a higher gain setting than the *GFP-SINE2* image, and therefore shows stronger autofluorescence of the pollen cell wall. Scale bars =10  $\mu$ m.

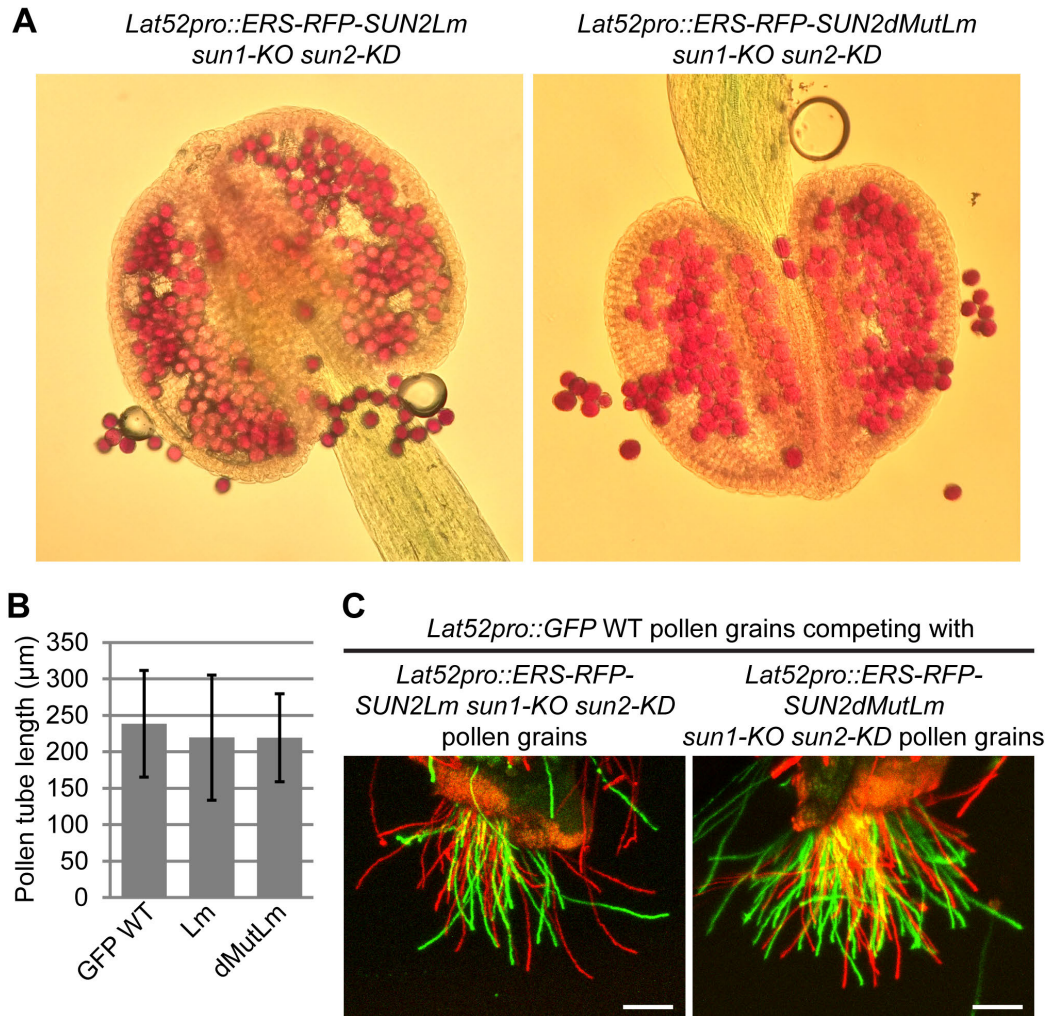

**Figure S4. Both *Lat52pro::ERS-RFP-SUN2Lm sun1-KO sun2-KD* and *Lat52pro::ERS-RFP-SUN2dMutLm sun1-KO sun2-KD* transgenic *Arabidopsis* plants produce healthy pollen grains.**

(A) Pollen grains were stained using Alexander's staining. No obvious dead pollen grains were found.

(B) Pollen tube length was measured after 5h *in vitro* pollen germination. "Lm" represents *Lat52pro::ERS-RFP-SUN2Lm sun1-KO sun2-KD* and "dMutLm" represents *Lat52pro::ERS-RFP-SUN2dMutLm sun1-KO sun2-KD*. No significant difference was found among samples. One-way analysis of variance ( $\alpha < 0.01$ ) followed by Tukey's honest significant difference test ( $\alpha < 0.01$ ) was used.

(D) No overall pollen germination defects and pollen tube growth defects were observed when *Lat52pro::ERS-RFP-SUN2Lm sun1-KO sun2-KD* pollen or *Lat52pro::ERS-RFP-SUN2dMutLm sun1-KO sun2-KD* pollen competed with *Lat52pro::GFP WT* pollen on a WT stigma. One-half of a stage 14 WT stigma was saturated with *Lat52pro::GFP wit12* pollen, and the other one-half was saturated with the tested pollen. Pollen tubes were imaged 5 h later using confocal microscopy. Each image is a maximum projection of a z-stack image. Scale bars = 100 µm.

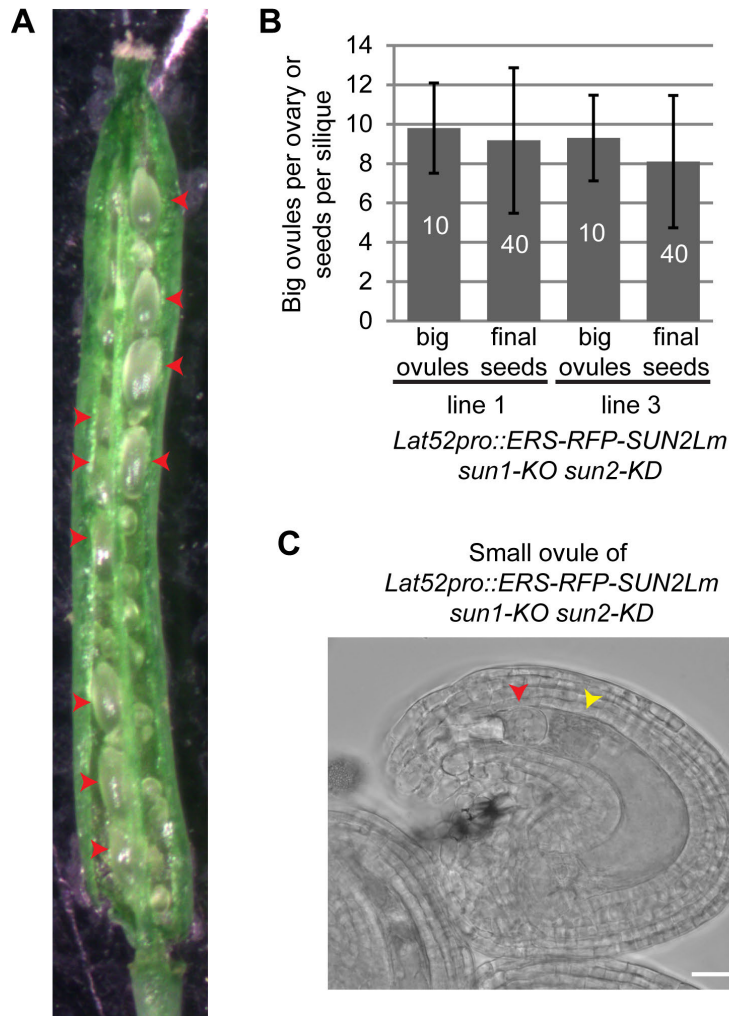

**Figure S5. Fertilization defects in ovaries of *Lat52pro::ERS-RFP-SUN2Lm sun1-KO sun2-KD***

(A) A small number of big ovules (red arrowhead) and a large number of small ovules were observed in ovaries of *Lat52pro::ERS-RFP-SUN2Lm sun1-KO sun2-KD*.

(B) The number of big ovules per ovary and the number of seeds per silique in *Lat52pro::ERS-RFP-SUN2Lm sun1-KO sun2-KD* were compared. No significant difference was found among samples. One-way analysis of variance ( $\alpha < 0.01$ ) followed by Tukey's honest significant difference test ( $\alpha < 0.01$ ) was used. N of each sample is indicated in the histogram.

(C) The central cell nucleus (yellow arrowhead) and the egg cell (red arrowhead) can be observed in the small ovule of *Lat52pro::ERS-RFP-SUN2Lm sun1-KO sun2-KD*. Scale bar equal 50  $\mu\text{m}$ .

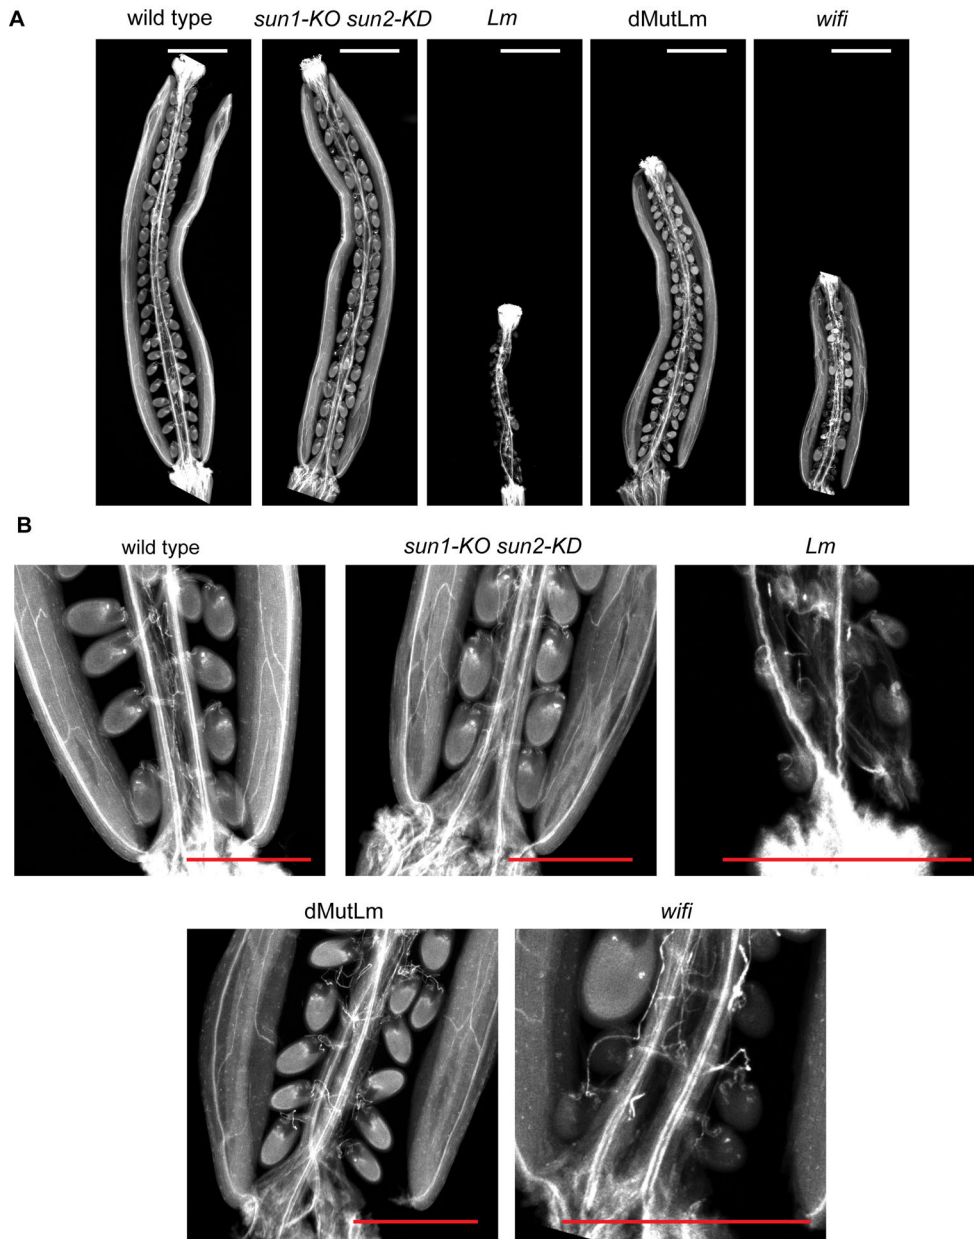

**Figure S6. Pollen tube growth in pistils revealed by aniline blue staining**

Overview of pollen tubes in pistils 3 days after flower opening are shown in (A) and pollen tubes at the receptacle end were enlarged and shown in (B). “Lm” represents *Lat52pro::ERS-RFP-SUN2Lm sun1-KO sun2-KD*. “dMutLm” represents *Lat52pro::ERS-RFP-SUN2dMutLm sun1-KO sun2-KD*. Scale bars = 500 μm.

**Table S1 Pollen tube fate in ovaries 3 days after flower opening**

|                                       | WT                    |                           |                    | <i>sun1-KO sun2-KD</i> |                           |                    | Lm line 1             |                           |                    | Lm line 3             |                           |                    | dMutLm line 2         |                           |                    | dMutLm line 3         |                           |                    | <i>wifi</i>           |                           |                    |
|---------------------------------------|-----------------------|---------------------------|--------------------|------------------------|---------------------------|--------------------|-----------------------|---------------------------|--------------------|-----------------------|---------------------------|--------------------|-----------------------|---------------------------|--------------------|-----------------------|---------------------------|--------------------|-----------------------|---------------------------|--------------------|
|                                       | Big fertilized ovules | Small unfertilized ovules | Row Marginal Total | Big fertilized ovules  | Small unfertilized ovules | Row Marginal Total | Big fertilized ovules | Small unfertilized ovules | Row Marginal Total | Big fertilized ovules | Small unfertilized ovules | Row Marginal Total | Big fertilized ovules | Small unfertilized ovules | Row Marginal Total | Big fertilized ovules | Small unfertilized ovules | Row Marginal Total | Big fertilized ovules | Small unfertilized ovules | Row Marginal Total |
| With pollen tubes; not overgrown      | 348                   | 5                         | 353                | 378                    | 11                        | 389                | 71                    | 26                        | 97                 | 49                    | 34                        | 83                 | 384                   | 4                         | 388                | 426                   | 5                         | 431                | 164                   | 59                        | 223                |
| With overgrown pollen tubes           | 3                     | 1                         | 4                  | 8                      | 5                         | 13                 | 2                     | 102                       | 104                | 4                     | 93                        | 97                 | 9                     | 2                         | 11                 | 10                    | 9                         | 19                 | 17                    | 140                       | 157                |
| Without pollen tubes                  | 0                     | 7                         | 7                  | 0                      | 20                        | 20                 | 0                     | 169                       | 169                | 0                     | 183                       | 183                | 0                     | 8                         | 8                  | 0                     | 11                        | 11                 | 0                     | 61                        | 61                 |
| Column Marginal Total                 | 351                   | 13                        | 364                | 386                    | 36                        | 422                | 73                    | 297                       | 370                | 53                    | 310                       | 363                | 393                   | 14                        | 407                | 436                   | 25                        | 461                | 181                   | 260                       | 441                |
| Polytubey among Column Marginal Total | 7                     | 0                         | 7                  | 14                     | 1                         | 15                 | 4                     | 2                         | 6                  | 2                     | 3                         | 5                  | 17                    | 0                         | 17                 | 16                    | 1                         | 17                 | 15                    | 37                        | 52                 |

“Lm” represents *Lat52pro::ERS-RFP-SUN2Lm sun1-KO sun2-KD*. “dMutLm” represents *Lat52pro::ERS-RFP-SUN2dMutLm sun1-KO sun2-KD*.
